# Supplementary material
Source: publisher figshare collection journal article supplement (https://sage.figshare.com/ndownloader/files/15482882)
Supplement: Supplementary file 1 [file 15482882]

## **SUPPLEMENTARY INFORMATION**

For data, code, figures, visualizations, and other files, go to:

[https://osf.io/qf8zv/?view\\_only=529f6c8186664f18a0492e95c3893b57](https://osf.io/qf8zv/?view_only=529f6c8186664f18a0492e95c3893b57)

### **Complement to Main Text**

#### **Methods**

##### **Web Scraping**

We used Python 3.5.2 BeautifulSoup module to scrape the blog data. We then used NLTK module to clean and preprocess it. In particular, we: 1) combined hyphenated words into a single word, tokenized the data (i.e., divided it into words), changed all words to lower case, lemmatized words (i.e., remove inflectional endings to retain only the base form of a word; e.g., changing “be” to “is” or “walking” to “walk”), deleted stopwords (i.e., common words that provide little information; e.g., “the”), and removed punctuation and numbers. Only posts in English were included, as determined by an algorithm that checked the number of English words in the document. Other variables scraped where available included post tags, which were not analyzed in depth, but top tags are presented in a separate document in the repository. Blog citations might differ slightly from the sum of post citations since some citations were not attached to specific posts. We analyze blog citations for univariate descriptive statistics, and post citations for relationships. Person names were obtained in Python’s NLTK 3.2.5 module using the Stanford Named Entity Recognizer 3.8.0, 3 class model (Finkel, Grenager, & Manning, 2005). We used SharedCount (<https://www.sharedcount.com/>) to obtain social media indicators.

Other analyses’ cleaning used slight variations of the workflow presented in the main text. The list of comment authors retained only alphanumeric and space characters, and words were not changed to lower case. Length variables included all words (no stopwords deleted),

except when using as offsets for topic or sentiment analyses, which used preprocessed post/comment length.

For analyses on the *Behavioral and Brain Sciences* articles we obtained all articles from their online versions. Then, we applied the same topic model trained on the blog posts to the articles' text (see online repository for all data and a topic breakdown). In addition, we used an automated gender classifier on the authors' first names (<https://genderize.io/>). The algorithm is trained on social media profiles and it classified 95% of the names (see online repository for all classification data and code).

Sentiment scores were based on a dictionary approach, using the NRC Emotion Lexicon (Mohammad & Turney, 2013). The NRC Emotion Lexicon is a list of words and their associations with positive and negative sentiment. The association scores are binary (1 indicates association, 0 indicates no association), which were manually annotated by Amazon's Mechanical Turkers. To construct post/comment emotion scores, we counted word overlaps between post/comment contents and the dictionary using Python. Thus, emotion scores were number of positive (e.g., "ability", "important", "respectful") and negative (e.g., "abuse", "lax", "polemic") words per post/comment, and were analyzed with mixed negative binomial regressions. See <http://saifmohammad.com/WebPages/NRC-Emotion-Lexicon.htm> for access to the full lexicon.

The sentiment score procedure utilized here has several limitations. The dictionary-based approach was unable to capture patterns proper of informal communication (e.g., sarcasm), negations (e.g., "She is not smart" would be rated as positive because words are evaluated individually), or other predictive features at the sentence-level. Additionally, although some of the discussion surrounding online communication has revolved around tone, the current

sentiment analysis might be a poor indicator of the frequency and impact of civil or uncivil discussion. In other words, the sentiment analysis simply indicates the relative number of words rated as positive or negative when evaluated in isolation by human coders. Future attempts to study tone should focus on coded methods (Jamieson, 1999), domain-specific natural language processing models, dependency parsing (Jurafsky & Martin, 2016), and qualitative analyses.

### **Date analyses**

All models with date as a predictor included in the Supplement had post-level outcomes, and thus we used the same approach as for other predictors, with date standardized at the group level (i.e., how recent is the post compared to other posts within the blog?) and at the grand mean (i.e., how recent is the average post for the blog?; this is related but not identical to the age of the blog). In these, the date predictor was the R default, coded as the number of days since 1970-01-01.

### **LDA Topics**

For an introduction to LDA from which we based our simplified description of the algorithm, see Griffiths, Steyvers, and Tenenbaum (2007), or <https://eight2late.wordpress.com/2015/09/29/a-gentle-introduction-to-topic-modeling-using-r/>.

As a very simplified summary, the algorithm works by initially randomly assigning each word in each document to a topic, creating preliminary distributions of words over topics and topics over documents. Then, the algorithm iterates multiple times over the different documents and reassigns each word into a topic based on how likely the word is to belong to that new topic (based on the current distribution of words over topics) and how likely the topic is to occur in that document (based on the current distribution of topics over documents). Thus, the model iteratively updates a document words' topic assignment assuming that a word occurring often in

a topic is more likely to belong to that topic, and that a document with many words from a topic is more likely to have more words from that topic.

The LDA model was run on the preprocessed data. In addition, for LDA we used only words that appeared in at least 2 posts, thus removing possible typos, nonwords, etc. Choice of an appropriate number of topics was based on the *ldatuning* R package, attempting to identify a variety of topic number estimates (from 2 to 45) and choosing from those that performed well on the different metrics provided by the package. We opted to use 22 topics based on these metrics. Note that the results presented are only one of multiple potentially appropriate models and labeling is relatively subjective; topics are better understood by looking at the top words, particularly those more distinctive to the topic. We explored additional models using different algorithms and hyperparameters (e.g., number of topics, within those suggested as potentially appropriate by our tests), and these provided mostly comparable results. Also note that the topic model was run at the post level (i.e., each post was a document), not weighted by blog. The analysis used variational EM, but Gibbs sampling performed similarly. The LDA was run in Python, using Gensim's package (Rehurek & Sojka, 2010). We used the interactive visualization (available in online repository) to interpret topics because it allows for variation of relevance of words within topics. In other words, it allows users to explore words that occur more or less distinctively within each topic. This aids in interpretation. For a simple table of the top 10 words per topic, see Table S1.

LDA provides the proportion of words in the post that were allocated to each topic, which was used for models with topics as predictors. For analyses with topics as outcomes, we transformed the topic proportions into the count of words for each topic by multiplying the topic proportions per post provided by LDA by the number of preprocessed words per post. This

approach still resulted in decimals (due to minor estimation constraints in the LDA model, e.g., the removal of words that appear in only one post), so we rounded down all topic word counts (running the models without rounding resulted in negligible differences). This rounded count of words for each topic was the variable used for models with topic outcomes, as it allowed us to use negative binomial models, which provided easily interpretable rate ratios, and converged much faster than unrounded models.

## Results

For a list of the blogs included and some additional information about them, see Table S2.

Throughout the main text and the supplement, models are estimated using the R package lme4 (Bates, Maechler, Bolker, & Walker, 2015); estimates for categorical predictors are least squares means obtained with the R package lsmeans (Lenth, 2016). Analyses using date of the post exclude periods where there was only one active blog (10/2004-9/2008).

As indicated in the main text (footnote 2), we used negative binomial models for count outcomes (e.g., number of comments), which often fitted better than Poisson models due to over-dispersion. For models with topic outcomes, we added the log of the length of the post (more specifically, the number of words in the post that were used for LDA, excluding stopwords, etc.), as an offset. In addition, models with topic outcomes excluded posts for which the LDA post length was zero (e.g., because all words in the post were stopwords), resulting in the removal of 69 posts. For convergence, we used zero-inflated negative binomial models for social media impact outcomes. We used logistic regressions for dichotomous outcomes (e.g., whether a name was mentioned or not).

For judge-nominated names matched to all data: given the impact on date of first mention of matching a nominated name to the wrong person (e.g., due to common last names), post matching was manually checked up by the researchers until the first verified mention and mentions before this date were deleted. In Table S4 we present results using these revised results. However, since the same checking was not done on comment mentions, they are no longer comparable to post mentions. See Table S5 for an uncleaned version of post mentions for comparisons to comment mentions.

### **Tables Complementing Main Results**

See Table S3 for in-depth descriptive statistics. See Tables S4 and S5 for additional information about name nominations and results. See Table S6 for additional information (e.g., p-values) for models from the main text. See Table S7 for date analyses model information. See Table S8 for models with count outcomes (from the main text) accounting for post date. See Table S9 for the predictors' intercepts and standard deviations.

### **Additional Analyses**

#### **Sentiment**

Sentiment scores (see Table S10) indicate that blogs tended to have average posts and comments with a greater percentage of positive than negative words, consistent with linguistic positivity biases in general (Matlin & Stang, 1978).

Controlling for career stage, male- and female-led blogs had similar percentages of positive words (Rate Ratio = 1.01, 95% CI = [.95, 1.08]), with male-led blogs having a slightly lower number of negative words ( $RR = 0.89$ , 95% CI = [.95, 1.08]). Controlling for gender, ECR and non-ECR were mostly similar in sentiment (Positive  $RR = 1.00$ , 95% CI = [.92, 1.08]; Negative  $RR = 1.03$ , 95% CI = [.90, 1.17]). Posts that mentioned a nominated researcher (vs. not)

barely differed on positive sentiment ( $RR = 0.99$ , 95% CI = [.97, 1.00]), but negative sentiment was slightly higher in those mentioning nominated names ( $RR = 1.06$ , 95% CI = [1.02, 1.10]). Posts that mentioned non-nominated names showed similar small differences, (Positive  $RR = 0.99$ , 95% CI = [.97, 1.01]; Negative  $RR = 1.04$ , 95% CI = [1.00, 1.07]).

Percentages of words related to *statistics* were negatively related to positive sentiment, both within ( $RR = .96$ , 95% CI = [.95, .96]) and between ( $RR = .92$ , 95% CI = [.91, .94]) blogs. Percentages of words related to *statistics* also negatively related to negative sentiment (post-level  $RR = .90$ , 95% CI = [.87, .92]; blog-level  $RR = .92$ , 95% CI = [.88, .96]) blogs. Percentage of words related to *research findings* was only slightly related to positive sentiment at the post ( $RR = 1.02$ , 95% CI = [1.02, 1.03]) and blog ( $RR = .99$ , 95% CI = [.94, 1.04]) levels. Percentage of words related to *research findings* slightly related to negative sentiment at the post level ( $RR = 1.07$ , 95% CI = [1.06, 1.08]) and the blog-level ( $RR = 1.03$ , 95% CI = [0.95, 1.13]). Percentages of words related to *replication* topics were very slightly negatively related to positive sentiment ( $RR = .98$ , 95% CI = [.98, .99]) at the post level, with a smaller association at the blog level ( $RR = 1.00$ , 95% CI = [.97, 1.02]). Percentages of words related to *replication* topics were slightly positively related to negative sentiment ( $RR = 1.02$ , 95% CI = [1.01, 1.03]) at the post level, with a smaller, and negative, association at the blog level ( $RR = 0.98$ , 95% CI = [.93, 1.03]). For *fraud*, differences on positive (post-level  $RR = 1.00$ , 95% CI = [.99, 1.00]; blog-level  $RR = 1.01$ , 95% CI = [0.99, 1.03]) and negative (post-level  $RR = 1.00$ , 95% CI = [.97, 1.03]; blog-level  $RR = .99$ , 95% CI = [0.95, 1.03]) content were also small.

### **Date analyses**

***Name mentions.*** Time trends indicated that more recent posts within blogs and blogs with more recent average posts both had more name mentions. Thus, although bloggers did not

often mention the nominated researchers, they tended to do so more often over time, and this pattern was stronger than for non-nominated names (which could partially reflect the time of collection of nominated names being more recent).

**Topics.** Time trends indicated that more recent posts within blogs and blogs with more recent average posts both related to more *replication* and *fraud* words, and slightly to more *statistics* words. Trends for *research findings* were small. Thus, newer posts and blogs included more *replication*, *statistics* and *fraud* talk.

**Engagement.** Time trends indicate that more recent posts within blogs got more comment engagement, while newer blogs (more recent average post dates) received less engagement.

Similarly to comments, newer posts within blogs got more views, while newer blogs received fewer views. The pattern for social media suggested that more recent posts had more impact, and to a much smaller extent, so did more recent blogs. Note that results for social media impact may speak more to changes in social media use (Facebook, Pinterest, StumbleUpon) over time than about blogs.

**Citations.** Time trends indicated that post citations increased with post-level recency but decreased for newer blogs (i.e., with blog-level recency).

## Citations

Men ( $M = 10965.63$ ,  $SD = 16769.11$ , Median = 4265) had more journal and book citations than women ( $M = 6750$ ,  $SD = 14607.92$ , Median = 397). Analyzing as a rate per publications diminished this difference ( $M = 67.19$  vs.  $35.53$ ; Medians =  $60.28$  vs.  $25.33$ ).

### References

- Bates, D., Maechler, M., Bolker, B., Walker, S. (2015). Fitting linear mixed-effects models using lme4. *Journal of Statistical Software*, 67(1), 1-48. doi:10.18637/jss.v067.i01.
- Finkel, J. R., Grenager, T., & Manning, C. (2005). Incorporating non-local information into information extraction systems by Gibbs sampling. *Proceedings of the 43rd Annual Meeting of the Association for Computational Linguistics (ACL 2005)*, 363-370.
- Retrieved from: <http://nlp.stanford.edu/~manning/papers/gibbscrf3.pdf>
- Griffiths, T. L., Steyvers, M., & Tenenbaum, J. B. (2007). Topics in semantic representation. *Psychological Review*, 114(2), 211. doi: 10.1037/0033-295X.114.2.211
- Jamieson, K. H. (1999). Civility in the House of Representatives: The 105th Congress (Report No. 26). Philadelphia, PA: The Annenberg Public Policy Center of the University of Pennsylvania. Retrieved from <http://cdn.annenbergpublicpolicycenter.org/wp-content/uploads/REP261.pdf>
- Jurafsky D., & Martin, J. H. (2016). *Speech and language processing* (2<sup>nd</sup> ed.). Upper Saddle River, NJ: Prentice Hall.
- Lenth, R. V. (2016). Least-squares means: The R package lsmeans. *Journal of Statistical Software*, 69. doi:10.18637/jss.v069.i01
- Matlin, M. W., & Stang, D. J. (1978). *The Pollyanna principle: Selectivity in language, memory, and thought*. Cambridge, MA: Schenkman.
- Mohammad, S. M., & Turney, P. D. (2013). Crowdsourcing a word–emotion association lexicon. *Computational Intelligence*, 29(3), 436-465.

PsychBrief (2017a, January 25). Improving the psychological methods feed. *PsychBrief*,

Available at <http://psychbrief.com/improving-the-psychological-methods-feed-2/>.

Accessed June 10, 2017.

Table S1. 22 LDA topics and their top 10 words and probability within each topic.

| # | Topic             | Words       | P    | #  | Topic          | Words       | P    |
|---|-------------------|-------------|------|----|----------------|-------------|------|
| 1 | Stat: Regression  | model       | 0.03 | 12 | Replication    | study       | 0.03 |
| 1 | Stat: Regression  | regression  | 0.03 | 12 | Replication    | effect      | 0.03 |
| 1 | Stat: Regression  | variable    | 0.02 | 12 | Replication    | result      | 0.03 |
| 1 | Stat: Regression  | estimate    | 0.02 | 12 | Replication    | power       | 0.02 |
| 1 | Stat: Regression  | paper       | 0.02 | 12 | Replication    | size        | 0.02 |
| 1 | Stat: Regression  | question    | 0.02 | 12 | Replication    | replication | 0.01 |
| 1 | Stat: Regression  | effect      | 0.01 | 12 | Replication    | test        | 0.01 |
| 1 | Stat: Regression  | causal      | 0.01 | 12 | Replication    | significant | 0.01 |
| 1 | Stat: Regression  | measure     | 0.01 | 12 | Replication    | sample      | 0.01 |
| 1 | Stat: Regression  | correlation | 0.01 | 12 | Replication    | researcher  | 0.01 |
| 2 | Stat: General     | model       | 0.07 | 13 | Teaching       | student     | 0.04 |
| 2 | Stat: General     | data        | 0.05 | 13 | Teaching       | class       | 0.02 |
| 2 | Stat: General     | method      | 0.02 | 13 | Teaching       | teach       | 0.02 |
| 2 | Stat: General     | bayesian    | 0.02 | 13 | Teaching       | school      | 0.01 |
| 2 | Stat: General     | analysis    | 0.02 | 13 | Teaching       | time        | 0.01 |
| 2 | Stat: General     | statistic   | 0.02 | 13 | Teaching       | game        | 0.01 |
| 2 | Stat: General     | statistical | 0.02 | 13 | Teaching       | good        | 0.01 |
| 2 | Stat: General     | work        | 0.01 | 13 | Teaching       | give        | 0.01 |
| 2 | Stat: General     | problem     | 0.01 | 13 | Teaching       | team        | 0.01 |
| 2 | Stat: General     | fit         | 0.01 | 13 | Teaching       | player      | 0.01 |
| 3 | Demographics      | state       | 0.02 | 14 | Stat: Software | code        | 0.02 |
| 3 | Demographics      | survey      | 0.02 | 14 | Stat: Software | function    | 0.01 |
| 3 | Demographics      | income      | 0.02 | 14 | Stat: Software | program     | 0.01 |
| 3 | Demographics      | country     | 0.01 | 14 | Stat: Software | package     | 0.01 |
| 3 | Demographics      | rich        | 0.01 | 14 | Stat: Software | user        | 0.01 |
| 3 | Demographics      | woman       | 0.01 | 14 | Stat: Software | version     | 0.01 |
| 3 | Demographics      | white       | 0.01 | 14 | Stat: Software | graphic     | 0.01 |
| 3 | Demographics      | rate        | 0.01 | 14 | Stat: Software | software    | 0.01 |
| 3 | Demographics      | number      | 0.01 | 14 | Stat: Software | page        | 0.01 |
| 3 | Demographics      | people      | 0.01 | 14 | Stat: Software | bug         | 0.01 |
| 4 | Stat: Frequentist | test        | 0.07 | 15 | Nutrition      | eat         | 0.04 |
| 4 | Stat: Frequentist | error       | 0.05 | 15 | Nutrition      | animal      | 0.03 |

|   |                   |              |      |    |                 |             |      |
|---|-------------------|--------------|------|----|-----------------|-------------|------|
| 4 | Stat: Frequentist | statistical  | 0.03 | 15 | Nutrition       | die         | 0.02 |
| 4 | Stat: Frequentist | inference    | 0.02 | 15 | Nutrition       | food        | 0.02 |
| 4 | Stat: Frequentist | sample       | 0.02 | 15 | Nutrition       | wansink     | 0.02 |
| 4 | Stat: Frequentist | significance | 0.02 | 15 | Nutrition       | visualize   | 0.01 |
| 4 | Stat: Frequentist | frequentist  | 0.02 | 15 | Nutrition       | specie      | 0.01 |
| 4 | Stat: Frequentist | likelihood   | 0.01 | 15 | Nutrition       | eats        | 0.01 |
| 4 | Stat: Frequentist | experiment   | 0.01 | 15 | Nutrition       | na          | 0.01 |
| 4 | Stat: Frequentist | severity     | 0.01 | 15 | Nutrition       | pig         | 0.01 |
| 5 | Law               | law          | 0.03 | 16 | Sci Comm        | research    | 0.02 |
| 5 | Law               | case         | 0.03 | 16 | Sci Comm        | paper       | 0.02 |
| 5 | Law               | crime        | 0.03 | 16 | Sci Comm        | science     | 0.02 |
| 5 | Law               | court        | 0.03 | 16 | Sci Comm        | journal     | 0.02 |
| 5 | Law               | judge        | 0.02 | 16 | Sci Comm        | publish     | 0.01 |
| 5 | Law               | police       | 0.02 | 16 | Sci Comm        | article     | 0.01 |
| 5 | Law               | evidence     | 0.01 | 16 | Sci Comm        | review      | 0.01 |
| 5 | Law               | lawyer       | 0.01 | 16 | Sci Comm        | work        | 0.01 |
| 5 | Law               | penalty      | 0.01 | 16 | Sci Comm        | university  | 0.01 |
| 5 | Law               | death        | 0.01 | 16 | Sci Comm        | author      | 0.01 |
| 6 | Clinical          | patient      | 0.03 | 17 | RF: Experiment  | study       | 0.03 |
| 6 | Clinical          | trial        | 0.03 | 17 | RF: Experiment  | effect      | 0.02 |
| 6 | Clinical          | treatment    | 0.03 | 17 | RF: Experiment  | group       | 0.02 |
| 6 | Clinical          | study        | 0.02 | 17 | RF: Experiment  | difference  | 0.02 |
| 6 | Clinical          | clinical     | 0.01 | 17 | RF: Experiment  | control     | 0.01 |
| 6 | Clinical          | cancer       | 0.01 | 17 | RF: Experiment  | data        | 0.01 |
| 6 | Clinical          | intervention | 0.01 | 17 | RF: Experiment  | result      | 0.01 |
| 6 | Clinical          | drug         | 0.01 | 17 | RF: Experiment  | report      | 0.01 |
| 6 | Clinical          | group        | 0.01 | 17 | RF: Experiment  | sample      | 0.01 |
| 6 | Clinical          | therapy      | 0.01 | 17 | RF: Experiment  | size        | 0.01 |
| 7 | Social Sci        | republican   | 0.01 | 18 | RF: Theoretical | science     | 0.01 |
| 7 | Social Sci        | voter        | 0.01 | 18 | RF: Theoretical | claim       | 0.01 |
| 7 | Social Sci        | year         | 0.01 | 18 | RF: Theoretical | theory      | 0.01 |
| 7 | Social Sci        | people       | 0.01 | 18 | RF: Theoretical | statistical | 0.01 |
| 7 | Social Sci        | cost         | 0.01 | 18 | RF: Theoretical | evidence    | 0.01 |
| 7 | Social Sci        | government   | 0.01 | 18 | RF: Theoretical | argument    | 0.01 |
| 7 | Social Sci        | health       | 0.01 | 18 | RF: Theoretical | point       | 0.01 |
| 7 | Social Sci        | money        | 0.01 | 18 | RF: Theoretical | view        | 0.01 |
| 7 | Social Sci        | decision     | 0.01 | 18 | RF: Theoretical | issue       | 0.01 |
| 7 | Social Sci        | risk         | 0.01 | 18 | RF: Theoretical | statistic   | 0.01 |
| 8 | Fraud             | data         | 0.12 | 19 | Clinical        | child       | 0.02 |
| 8 | Fraud             | analysis     | 0.02 | 19 | Clinical        | people      | 0.01 |
| 8 | Fraud             | information  | 0.01 | 19 | Clinical        | disorder    | 0.01 |
| 8 | Fraud             | share        | 0.01 | 19 | Clinical        | mental      | 0.01 |
| 8 | Fraud             | case         | 0.01 | 19 | Clinical        | disease     | 0.01 |

|    |                |              |      |    |               |             |      |
|----|----------------|--------------|------|----|---------------|-------------|------|
| 8  | Fraud          | report       | 0.01 | 19 | Clinical      | parent      | 0.01 |
| 8  | Fraud          | fraud        | 0.01 | 19 | Clinical      | gene        | 0.01 |
| 8  | Fraud          | research     | 0.01 | 19 | Clinical      | year        | 0.01 |
| 8  | Fraud          | researcher   | 0.01 | 19 | Clinical      | autism      | 0.01 |
| 8  | Fraud          | request      | 0.01 | 19 | Clinical      | study       | 0.01 |
| 9  | Stat: Bayesian | probability  | 0.03 | 20 | Psy: General  | word        | 0.02 |
| 9  | Stat: Bayesian | prior        | 0.02 | 20 | Psy: General  | language    | 0.02 |
| 9  | Stat: Bayesian | distribution | 0.02 | 20 | Psy: General  | task        | 0.02 |
| 9  | Stat: Bayesian | bayesian     | 0.01 | 20 | Psy: General  | seth        | 0.02 |
| 9  | Stat: Bayesian | model        | 0.01 | 20 | Psy: General  | cognitive   | 0.02 |
| 9  | Stat: Bayesian | hypothesis   | 0.01 | 20 | Psy: General  | personality | 0.01 |
| 9  | Stat: Bayesian | data         | 0.01 | 20 | Psy: General  | memory      | 0.01 |
| 9  | Stat: Bayesian | parameter    | 0.01 | 20 | Psy: General  | social      | 0.01 |
| 9  | Stat: Bayesian | posterior    | 0.01 | 20 | Psy: General  | psychology  | 0.01 |
| 9  | Stat: Bayesian | give         | 0.01 | 20 | Psy: General  | learn       | 0.01 |
| 10 | Unidentified   | people       | 0.03 | 21 | Neuroscience  | brain       | 0.02 |
| 10 | Unidentified   | write        | 0.02 | 21 | Neuroscience  | human       | 0.01 |
| 10 | Unidentified   | thing        | 0.02 | 21 | Neuroscience  | show        | 0.01 |
| 10 | Unidentified   | good         | 0.02 | 21 | Neuroscience  | time        | 0.01 |
| 10 | Unidentified   | book         | 0.02 | 21 | Neuroscience  | paper       | 0.01 |
| 10 | Unidentified   | time         | 0.01 | 21 | Neuroscience  | activity    | 0.01 |
| 10 | Unidentified   | work         | 0.01 | 21 | Neuroscience  | point       | 0.01 |
| 10 | Unidentified   | lot          | 0.01 | 21 | Neuroscience  | district    | 0.01 |
| 10 | Unidentified   | point        | 0.01 | 21 | Neuroscience  | fmri        | 0.01 |
| 10 | Unidentified   | story        | 0.01 | 21 | Neuroscience  | area        | 0.01 |
| 11 | Social Sci     | vote         | 0.05 | 22 | Stat: Figures | graph       | 0.08 |
| 11 | Social Sci     | election     | 0.03 | 22 | Stat: Figures | plot        | 0.05 |
| 11 | Social Sci     | political    | 0.03 | 22 | Stat: Figures | line        | 0.03 |
| 11 | Social Sci     | state        | 0.03 | 22 | Stat: Figures | figure      | 0.03 |
| 11 | Social Sci     | party        | 0.02 | 22 | Stat: Figures | table       | 0.02 |
| 11 | Social Sci     | poll         | 0.02 | 22 | Stat: Figures | show        | 0.02 |
| 11 | Social Sci     | democrat     | 0.02 | 22 | Stat: Figures | data        | 0.02 |
| 11 | Social Sci     | candidate    | 0.01 | 22 | Stat: Figures | display     | 0.02 |
| 11 | Social Sci     | conservative | 0.01 | 22 | Stat: Figures | curve       | 0.01 |
| 11 | Social Sci     | issue        | 0.01 | 22 | Stat: Figures | log         | 0.01 |



Table S2. Blog sample

| Blog                               | Blog Address                              | Lead Author(s)                            | Weeks since creation | Number of posts | Posting rate |
|------------------------------------|-------------------------------------------|-------------------------------------------|----------------------|-----------------|--------------|
| [citation needed]                  | talyarkoni.org/blog/                      | Tal Yarkoni                               | 392.43               | 166             | 0.42         |
| Absolutely Maybe                   | blogs.plos.org/absolutely-maybe/          | Hilda Bastian                             | 194.86               | 103             | 0.53         |
| Approaching Significance           | approachingblog.wordpress.com             | Roger Giner-Sorolla                       | 62.29                | 8               | 0.13         |
| Basic Statistics                   | garstats.wordpress.com/                   | Guillaume Rousselet                       | 56.86                | 16              | 0.28         |
| BishopBlog                         | deevybee.blogspot.co.uk/                  | Dorothy Bishop                            | 358.29               | 186             | 0.52         |
| CogTales                           | cogtales.wordpress.com                    | Christina Bergmann & Sho Tsuji            | 73.14                | 40              | 0.55         |
| Crystal Prison Zone                | crystalprisonzone.blogspot.co.uk/         | Joe Hilgard                               | 265.57               | 43              | 0.16         |
| Data Colada                        | datacolada.org/                           | Leif Nelson, Joe Simmons, & Uri Simonsohn | 186                  | 58              | 0.31         |
| Doing Bayesian Data Analysis       | doingbayesiandataanalysis.blogspot.co.uk/ | John K. Kruschke                          | 312.86               | 203             | 0.65         |
| Error Statistics Philosophy        | errorstatistics.com/                      | Deborah G. Mayo                           | 292.43               | 719             | 2.46         |
| Felix Schönbrodt                   | www.nicebread.de/                         | Felix Schönbrodt                          | 260.71               | 48              | 0.18         |
| Funderstorms                       | funderstorms.wordpress.com/               | David Funder                              | 232.57               | 22              | 0.09         |
| Im a Bayesian and I do what I want | sites.uci.edu/joachim/                    | Joachim Vandekerckhove                    | 40                   | 3               | 0.08         |
| Inattentional Coffee               | inattentionalcoffee.wordpress.com/        | Katherine Wood                            | 14.14                | 9               | 0.64         |
| Invariances                        | jeffrouder.blogspot.co.uk/                | Jeff Rouder                               | 109.71               | 25              | 0.23         |
| Lorne Campbell                     | lornecampbell.org                         | Lorne Campbell                            | 126.29               | 25              | 0.2          |
| Matti Heino                        | mattiheino.com                            | Matti Heino                               | 62.43                | 12              | 0.19         |
| Mind the Brain                     | blogs.plos.org/mindthebrain/              | James C. Coyne                            | 236.71               | 157             | 0.66         |

|                                                                               |                                                                                                        |                                |        |      |       |
|-------------------------------------------------------------------------------|--------------------------------------------------------------------------------------------------------|--------------------------------|--------|------|-------|
| My Scholarly Goop                                                             | <a href="http://myscholarlygoop.wordpress.com/">myscholarlygoop.wordpress.com/</a>                     | Hanne M. Watkins               | 81.14  | 37   | 0.46  |
| NeuroAnaTody                                                                  | <a href="http://neuroanatody.com/">neuroanatody.com/</a>                                               | Ana Todorovic                  | 71.86  | 16   | 0.22  |
| Neuroconscience                                                               | <a href="http://micahallen.org">micahallen.org</a>                                                     | Micah Allen                    | 388.71 | 92   | 0.24  |
| NeuroNeurotic                                                                 | <a href="http://neuroneurotic.net/">neuroneurotic.net/</a>                                             | Sam Schwarzkopf                | 107.71 | 49   | 0.45  |
| Neuroskeptic                                                                  | <a href="http://blogs.discovermagazine.com/neuroskeptic/">blogs.discovermagazine.com/neuroskeptic/</a> | Neuroskeptic                   | 441.43 | 1180 | 2.67  |
| Not That Kind of Psychologist                                                 | <a href="http://asehelene.wordpress.com">asehelene.wordpress.com</a>                                   | Åse Kvist Innes-Ker            | 347.57 | 181  | 0.52  |
| PIGEE                                                                         | <a href="http://pigeen.wordpress.com">pigeen.wordpress.com</a>                                         | Brent Roberts, R. Chris Fraley | 335.57 | 48   | 0.14  |
| Psych Networks                                                                | <a href="http://psych-networks.com/">psych-networks.com/</a>                                           | Eiko Fried                     | 25.86  | 22   | 0.85  |
| PsychBrief                                                                    | <a href="http://psychbrief.com/">psychbrief.com/</a>                                                   | Anonymous                      | 178.57 | 41   | 0.23  |
| Quick Thoughts                                                                | <a href="http://jcoynester.wordpress.com">jcoynester.wordpress.com</a>                                 | James C. Coyne                 | 273.29 | 150  | 0.55  |
| R Psychologist                                                                | <a href="http://rpsychologist.com/">rpsychologist.com/</a>                                             | Kristoffer Magnusson           | 264    | 39   | 0.15  |
| Replicability-Index                                                           | <a href="http://replicationindex.wordpress.com/">replicationindex.wordpress.com/</a>                   | Ulrich Schimmack               | 123.14 | 129  | 1.05  |
| Sak on Science                                                                | <a href="http://sakaluk.wordpress.com/">sakaluk.wordpress.com/</a>                                     | John Sakaluk                   | 105.14 | 15   | 0.14  |
| Sometimes I'm Wrong                                                           | <a href="http://sometimesimwrong.typepad.com/">sometimesimwrong.typepad.com/</a>                       | Simine Vazire                  | 162.43 | 50   | 0.31  |
| Statistical methods, inference, and open science                              | <a href="http://richarddmorey.org/">richarddmorey.org/</a>                                             | Richard D Morey                | 165.29 | 32   | 0.19  |
| Statistical Modeling, Causal Inference, & Social Science                      | <a href="http://andrewgelman.com/">andrewgelman.com/</a>                                               | Andrew Gelman                  | 652    | 7211 | 11.06 |
| The 20% Statistician                                                          | <a href="http://daniellakens.blogspot.co.uk/">daniellakens.blogspot.co.uk/</a>                         | Daniel Lakens                  | 151.71 | 70   | 0.46  |
| The Etz Files                                                                 | <a href="http://alexanderetz.com">alexanderetz.com</a>                                                 | Alex Etz                       | 159.86 | 36   | 0.23  |
| The Hardest Science                                                           | <a href="http://hardsci.wordpress.com">hardsci.wordpress.com</a>                                       | Sanjay Srivastava              | 421.43 | 182  | 0.43  |
| The NeuroEconomist                                                            | <a href="http://theneuroeconomist.com/">theneuroeconomist.com/</a>                                     | Gideon nave                    | 75.57  | 4    | 0.05  |
| The Skeptical Scientist                                                       | <a href="http://timvanderzee.wordpress.com/">timvanderzee.wordpress.com/</a>                           | Tim van der Zee                | 41.86  | 13   | 0.31  |
| Xenia Schmalzs Blog                                                           | <a href="http://xeniaschmalz.blogspot.co.uk/">xeniaschmalz.blogspot.co.uk/</a>                         | Xenia Schmalz                  | 90.57  | 18   | 0.2   |
| Zeistgeist: Psychological Experimentation, Cognition, Language, and Academia. | <a href="http://rolfzwaan.blogspot.com">rolfzwaan.blogspot.com</a>                                     | Rolf Zwaan                     | 223.29 | 81   | 0.36  |

Table S3. Blogs and bloggers descriptive statistics

|                                     | Mean   | SD      | Min   | Q1    | Median | Q3      | Max     |
|-------------------------------------|--------|---------|-------|-------|--------|---------|---------|
| Number of posts                     | 281.4  | 1128.6  | 3.0   | 22.0  | 43.0   | 129.0   | 7211.0  |
| Posting rate (per week)             | 0.7    | 1.7     | 0.1   | 0.2   | 0.3    | 0.5     | 11.1    |
| Post length (in words)              | 1116.0 | 489.8   | 390.3 | 808.3 | 1016.8 | 1353.4  | 2423.8  |
| Comment section length (in words)   | 622.4  | 841.6   | 1.5   | 163.7 | 323.5  | 850.5   | 4817.2  |
| Avg. Comment length (in words)      | 112.4  | 105.3   | 16.0  | 73.9  | 91.3   | 119.0   | 694.3   |
| Number of comments                  | 4.6    | 4.2     | 0.1   | 1.8   | 3.3    | 5.3     | 16.4    |
| Number of commenters                | 2.7    | 2.2     | 0.1   | 1.2   | 2.1    | 3.7     | 9.6     |
| Social media impact                 | 36.3   | 55.8    | 0     | 3.9   | 16.5   | 37.6    | 237.0   |
| Post views                          | 2438.9 | 2468.6  | 64.6  | 574.9 | 1959.8 | 3472.1  | 9354.1  |
| Weeks since creation                | 199.2  | 139.9   | 14.1  | 81.1  | 165.3  | 273.3   | 652.0   |
| Blog citations (total)              | 22.8   | 51.4    | 0.0   | 1.0   | 3.0    | 30.0    | 308.0   |
| Blogger citations (total)           | 9651.3 | 15966.8 | 3.0   | 342.0 | 3199.5 | 10462.0 | 72332.0 |
| Blog citations (per post)           | 0.2    | 0.3     | 0.0   | 0.0   | 0.1    | 0.2     | 1.7     |
| Blogger citations (per publication) | 58.2   | 66.9    | 0.3   | 12.5  | 43.5   | 83.1    | 368.5   |

*Note.* Mean, standard deviation, and 5-number summaries at the blog level (averaging across posts for post-level variables).

Table S4. Nominated researchers' names, coded gender, number of judges naming the researcher (consensus), number of posts and comments mentioning each researcher, date of first post mention, and post mention rate.

| Name         | Gender | Consensus | Post mentions | Comment mentions | Date of first mention | Post mentions rate |
|--------------|--------|-----------|---------------|------------------|-----------------------|--------------------|
| Bargh        | M      | 8         | 49            | 39               | 3/12/2012             | 0.185              |
| Baumeister   | M      | 6         | 28            | 24               | 6/4/2010              | 0.078              |
| Bem          | M      | 2         | 154           | 130              | 1/10/2011             | 0.472              |
| Bianchi      | F      | 1         | 4             | 3                | 7/16/2012             | 0.016              |
| Cosmides     | F      | 1         | 5             | 6                | 4/8/2009              | 0.012              |
| Cote         | M      | 1         | 1             | 0                | 10/26/2016            | 0.042              |
| Cuddy        | F      | 13        | 28            | 71               | 7/8/2013              | 0.143              |
| De la o      | F      | 1         | 0             | 0                | NA                    | NA                 |
| Decelles     | F      | 1         | 2             | 4                | 5/3/2016              | 0.041              |
| Dijksterhuis | M      | 3         | 7             | 3                | 5/1/2013              | 0.034              |
| Duckworth    | F      | 2         | 5             | 10               | 11/16/2010            | 0.015              |
| Durante      | F      | 3         | 13            | 9                | 5/17/2013             | 0.064              |
| Dweck        | F      | 2         | 12            | 11               | 12/7/2007             | 0.025              |
| Finkel       | M      | 1         | 10            | 6                | 2/26/2015             | 0.090              |
| Fiske        | F      | 5         | 41            | 56               | 4/19/2007             | 0.079              |
| Förster      | M      | 4         | 37            | 36               | 05/01/2014            | 0.241              |
| Fredrickson  | F      | 2         | 20            | 21               | 1/23/2013             | 0.091              |
| Gabriel      | F      | 1         | 0             | 18               | NA                    | NA                 |
| Gilbert      | M      | 4         | 55            | 59               | 03/24/2010            | 0.150              |
| Goffman      | F      | 1         | 2             | 5                | 01/20/2016            | 0.031              |
| Haselton     | F      | 2         | 2             | 2                | 7/31/2013             | 0.010              |
| Hershfield   | M      | 1         | 1             | 2                | 11/24/2014            | 0.008              |
| Liberman     | F      | 1         | 5             | 10               | 06/11/2015            | 0.052              |
| Norton       | M      | 1         | 18            | 16               | 12/13/2007            | 0.037              |
| Saperstein   | F      | 1         | 2             | 2                | 6/7/2016              | 0.045              |
| Schnall      | F      | 10        | 20            | 17               | 5/24/2014             | 0.133              |
| Schwarz      | M      | 6         | 19            | 15               | 10/02/2006            | 0.035              |
| Seligman     | M      | 1         | 9             | 11               | 7/16/2013             | 0.046              |
| Smeesters    | M      | 2         | 25            | 15               | 4/6/2012              | 0.096              |
| Strack       | M      | 8         | 16            | 2                | 11/28/2012            | 0.070              |
| Stapel       | M      | 1         | 110           | 96               | 9/12/2011             | 0.378              |
| Stroebe      | M      | 1         | 7             | 2                | 12/6/2012             | 0.031              |
| Tracy        | F      | 2         | 13            | 35               | 07/31/2013            | 0.067              |
| Van Bavel    | M      | 4         | 3             | 1                | 7/13/2016             | 0.077              |
| Vohs         | F      | 5         | 17            | 13               | 3/18/2013             | 0.080              |
| Wansink      | M      | 3         | 20            | 30               | 2/21/2016             | 0.337              |
| Willer       | M      | 1         | 1             | 5                | 10/26/2016            | 0.042              |
| Zhong        | M      | 1         | 3             | 2                | 4/8/2014              | 0.019              |

*Note.* Consensus and mentions were positively correlated (Posts  $r = .16$ , comments  $r = .27$ ).

Table S5. Nominated researchers mentions

|                         | Mean | SD   | Min  | Q1   | Median | Q3   | Max   |
|-------------------------|------|------|------|------|--------|------|-------|
| % All – Posts           | 0.11 | 0.09 | 0.00 | 0.03 | 0.10   | 0.16 | 0.34  |
| % All – Comments        | 0.05 | 0.06 | 0.00 | 0.00 | 0.03   | 0.08 | 0.22  |
| # All – Posts           | 14.8 | 38.8 | 0.0  | 1.0  | 4.0    | 11.0 | 240.0 |
| # All – Comments        | 14.3 | 53.9 | 0.0  | 0.0  | 2.0    | 5.3  | 323.0 |
| # Individual – Posts    | 21.3 | 29.8 | 0    | 5.5  | 14     | 22.5 | 154   |
| # Individual – Comments | 20.2 | 27.9 | 0    | 3    | 10     | 22.5 | 130   |

*Note.* Mean, standard deviation, and five-number summary of nominated researcher mentions. Rows calculated for all researchers indicate the blog-level summary of the number/percentage of posts/comments that mention at least one nominated researcher. Rows calculated for individual researchers is a researcher-level summary (i.e., each researcher is an observation), and summarizes the total number of posts mentioning individual nominated researchers.

Table S6. Additional post-level model information.

| Outcome            | Predictor             | Intercept | Estimate | 2.5% CI | 97.5% CI | Statistic | P-value | Intercept SD | Estimate SD |
|--------------------|-----------------------|-----------|----------|---------|----------|-----------|---------|--------------|-------------|
| Nominated name     | Gender                | 0.09      | 1.49     | 0.89    | 2.48     | 1.51      | 0.131   | 0.72         |             |
| Nominated name     | Career-stage          | 0.09      | 1.14     | 0.65    | 2.01     | 0.45      | 0.652   | 0.72         |             |
| Non-nominated name | Gender                | 3.28      | 2.42     | 1.32    | 4.45     | 2.84      | 0.005   | 0.98         |             |
| Non-nominated name | Career-stage          | 3.28      | 1.49     | 0.81    | 2.74     | 1.29      | 0.196   | 0.98         |             |
| Statistics         | Gender                | 0.15      | 1.14     | 0.85    | 1.53     | 0.88      | 0.380   | 0.80         |             |
| Statistics         | Career-stage          | 0.15      | 0.71     | 0.50    | 1.02     | -1.87     | 0.062   | 0.80         |             |
| Statistics         | Nominated name        | 0.13      | 0.79     | 0.73    | 0.86     | -5.72     | <.001   | 0.84         |             |
| Statistics         | Non-nominated name    | 0.13      | 1.12     | 1.05    | 1.19     | 3.48      | <.001   | 0.84         |             |
| Research findings  | Gender                | 0.1       | 1.22     | 0.94    | 1.59     | 1.52      | 0.130   | 0.38         |             |
| Research findings  | Career-stage          | 0.1       | 0.84     | 0.65    | 1.09     | -1.30     | 0.192   | 0.38         |             |
| Research findings  | Nominated name        | 0.08      | 1.29     | 1.19    | 1.40     | 6.01      | <.001   | 0.34         |             |
| Research findings  | Non-nominated name    | 0.08      | 1.35     | 1.26    | 1.44     | 8.36      | <.001   | 0.34         |             |
| Replication        | Gender                | 0.09      | 2.00     | 1.17    | 3.41     | 2.54      | 0.011   | 0.86         | 0.08        |
| Replication        | Career-stage          | 0.09      | 0.97     | 0.61    | 1.56     | -0.11     | 0.916   | 0.86         |             |
| Replication        | Nominated name        | 0.09      | 2.00     | 1.76    | 2.28     | 10.36     | <.001   | 0.78         |             |
| Replication        | Non-nominated name    | 0.09      | 1.38     | 1.24    | 1.54     | 5.69      | <.001   | 0.78         |             |
| Fraud              | Gender                | 0.02      | 1.80     | 1.19    | 2.73     | 2.77      | 0.006   | 0.54         |             |
| Fraud              | Career-stage          | 0.02      | 1.09     | 0.71    | 1.67     | 0.39      | 0.700   | 0.54         |             |
| Fraud              | Nominated name        | 0.03      | 1.58     | 1.33    | 1.88     | 5.14      | <.001   | 0.57         |             |
| Fraud              | Non-nominated name    | 0.03      | 0.92     | 0.79    | 1.06     | -1.14     | 0.254   | 0.57         |             |
| Comments           | Gender                | 0.99      | 2.28     | 1.57    | 3.31     | 4.34      | <.001   | 0.95         |             |
| Comments           | Career-stage          | 0.99      | 2.16     | 1.37    | 3.4      | 3.33      | <.001   | 0.95         |             |
| Comments           | Statistics (g)        | 2.71      | 1.01     | 0.88    | 1.15     | 0.09      | 0.931   | 1.15         | 0.3         |
| Comments           | Statistics (m)        | 2.71      | 1.07     | 0.82    | 1.39     | 0.48      | 0.632   | 1.15         |             |
| Comments           | Research Findings (g) | 2.69      | 1.01     | 0.91    | 1.13     | 0.2       | 0.838   | 1.14         | 0.19        |
| Comments           | Research Findings (m) | 2.69      | 1.15     | 0.74    | 1.77     | 0.63      | 0.532   | 1.14         |             |
| Comments           | Replication (g)       | 2.66      | 1.17     | 1.05    | 1.3      | 2.79      | 0.005   | 1.15         | 0.22        |
| Comments           | Replication (m)       | 2.66      | 1        | 0.78    | 1.27     | -0.03     | 0.979   | 1.15         |             |

|           |                       |        |      |      |       |       |       |      |      |
|-----------|-----------------------|--------|------|------|-------|-------|-------|------|------|
| Comments  | Fraud (g)             | 3.12   | 0.96 | 0.88 | 1.06  | -0.82 | 0.411 | 1.12 | 0.12 |
| Comments  | Fraud (m)             | 3.12   | 0.89 | 0.75 | 1.05  | -1.38 | 0.167 | 1.12 |      |
| Comments  | Nominated name        | 1.73   | 1.96 | 1.78 | 2.16  | 13.76 | <.001 | 1.17 |      |
| Comments  | Non-nominated name    | 1.73   | 1.54 | 1.43 | 1.65  | 11.61 | <.001 | 1.17 |      |
| Commenter | Gender                | 0.77   | 1.99 | 1.45 | 2.73  | 4.25  | <.001 | 0.81 |      |
| Commenter | Career-stage          | 0.77   | 1.96 | 1.33 | 2.89  | 3.41  | 0.001 | 0.81 |      |
| Commenter | Statistics (g)        | 1.82   | 0.98 | 0.88 | 1.09  | -0.42 | 0.678 | 0.99 | 0.23 |
| Commenter | Statistics (m)        | 1.82   | 1.01 | 0.8  | 1.28  | 0.11  | 0.91  | 0.99 |      |
| Commenter | Research Findings (g) | 1.86   | 1.1  | 1.08 | 1.12  | 8.37  | <.001 | 0.98 |      |
| Commenter | Research Findings (m) | 1.86   | 1.04 | 0.75 | 1.45  | 0.24  | 0.814 | 0.98 |      |
| Commenter | Replication (g)       | 1.89   | 1.19 | 1.17 | 1.22  | 16.25 | <.001 | 0.98 |      |
| Commenter | Replication (m)       | 1.89   | 0.99 | 0.8  | 1.21  | -0.14 | 0.89  | 0.98 |      |
| Commenter | Fraud (g)             | 2      | 0.97 | 0.89 | 1.05  | -0.73 | 0.468 | 0.97 | 0.11 |
| Commenter | Fraud (m)             | 2      | 0.93 | 0.8  | 1.07  | -1.04 | 0.301 | 0.97 |      |
| Commenter | Nominated name        | 1.34   | 1.64 | 1.52 | 1.78  | 12.19 | <.001 | 0.99 |      |
| Commenter | Non-nominated name    | 1.34   | 1.33 | 1.26 | 1.42  | 9.34  | <.001 | 0.99 |      |
| SM impact | Gender                | 1.99   | 2.45 | 1.18 | 5.07  | 2.41  | 0.016 | 2.04 |      |
| SM impact | Career-stage          | 1.99   | 5.77 | 2.02 | 16.47 | 3.27  | 0.001 | 2.04 |      |
| SM impact | Statistics (g)        | 9.26   | 0.89 | 0.77 | 1.04  | -1.49 | 0.136 | 1.92 | 0.24 |
| SM impact | Statistics (m)        | 9.26   | 0.65 | 0.43 | 0.98  | -2.08 | 0.038 | 1.92 |      |
| SM impact | Research Findings (g) | 10.84  | 0.98 | 0.78 | 1.23  | -0.19 | 0.85  | 2.01 | 0.5  |
| SM impact | Research Findings (m) | 10.84  | 0.82 | 0.42 | 1.62  | -0.57 | 0.57  | 2.01 |      |
| SM impact | Replication (g)       | 6.73   | 1.41 | 1.15 | 1.74  | 3.22  | 0.001 | 2    | 0.48 |
| SM impact | Replication (m)       | 6.73   | 1.32 | 0.89 | 1.95  | 1.37  | 0.169 | 2    |      |
| SM impact | Fraud (g)             | 9.53   | 0.97 | 0.85 | 1.09  | -0.56 | 0.58  | 2    | 0.12 |
| SM impact | Fraud (m)             | 9.53   | 1.14 | 0.84 | 1.55  | 0.86  | 0.39  | 2    |      |
| SM impact | Nominated name        | 3.42   | 1.92 | 1.29 | 2.85  | 3.21  | 0.001 | 2.15 | 0.47 |
| SM impact | Non-nominated name    | 3.42   | 3.08 | 1.86 | 5.08  | 4.39  | <.001 | 2.15 | 0.9  |
| Views     | Gender                | 612.8  | 2.72 | 0.94 | 7.87  | 1.84  | 0.065 | 1.17 |      |
| Views     | Career-stage          | 612.8  | 1.35 | 0.5  | 3.65  | 0.59  | 0.553 | 1.17 |      |
| Views     | Statistics (g)        | 1296.5 | 1.16 | 0.95 | 1.4   | 1.47  | 0.142 | 1.25 | 0.41 |

|                |                       |        |      |      |      |       |       |      |      |
|----------------|-----------------------|--------|------|------|------|-------|-------|------|------|
| Views          | Statistics (m)        | 1296.5 | 1.15 | 0.74 | 1.77 | 0.62  | 0.538 | 1.25 | 0.28 |
| Views          | Research Findings (g) | 1273.3 | 1.03 | 0.89 | 1.19 | 0.38  | 0.707 | 1.27 |      |
| Views          | Research Findings (m) | 1273.3 | 1.17 | 0.68 | 2.03 | 0.56  | 0.574 | 1.27 |      |
| Views          | Replication (g)       | 824.52 | 1.23 | 1.14 | 1.32 | 5.31  | <.001 | 1.22 |      |
| Views          | Replication (m)       | 824.52 | 1.41 | 0.95 | 2.09 | 1.69  | 0.091 | 1.22 |      |
| Views          | Fraud (g)             | 1415.4 | 0.83 | 0.77 | 0.89 | -5.32 | <.001 | 1.26 |      |
| Views          | Fraud (m)             | 1415.4 | 0.95 | 0.74 | 1.21 | -0.43 | 0.665 | 1.26 |      |
| Views          | Nominated name        | 851.93 | 1.68 | 1.35 | 2.1  | 4.63  | <.001 | 1.28 |      |
| Views          | Non-nominated name    | 851.93 | 1.54 | 1.24 | 1.9  | 3.92  | <.001 | 1.28 | 0.12 |
| Post citations | Gender                | 0.03   | 2.28 | 1.07 | 4.85 | 2.15  | 0.032 | 1.02 |      |
| Post citations | Career-stage          | 0.03   | 2.52 | 1.03 | 6.18 | 2.02  | 0.044 | 1.02 |      |
| Post citations | Statistics (g)        | 0.08   | 1.11 | 0.88 | 1.39 | 0.87  | 0.385 | 1.11 |      |
| Post citations | Statistics (m)        | 0.08   | 1.08 | 0.74 | 1.57 | 0.39  | 0.693 | 1.11 |      |
| Post citations | Research Findings (g) | 0.08   | 1.12 | 1.02 | 1.24 | 2.3   | 0.022 | 1.12 |      |
| Post citations | Research Findings (m) | 0.08   | 0.97 | 0.63 | 1.49 | -0.15 | 0.882 | 1.12 |      |
| Post citations | Replication (g)       | 0.06   | 1.55 | 1.43 | 1.68 | 11.04 | <.001 | 1.03 |      |
| Post citations | Replication (m)       | 0.06   | 1.25 | 0.99 | 1.58 | 1.89  | 0.059 | 1.03 |      |
| Post citations | Fraud (g)             | 0.09   | 1    | 0.9  | 1.11 | 0.03  | 0.979 | 1.07 |      |
| Post citations | Fraud (m)             | 0.09   | 0.87 | 0.7  | 1.07 | -1.34 | 0.182 | 1.07 |      |
| Post citations | Nominated name        | 0.04   | 2.95 | 2.22 | 3.93 | 7.43  | <.001 | 1.14 |      |
| Post citations | Non-nominated name    | 0.04   | 1.71 | 1.23 | 2.38 | 3.18  | 0.002 | 1.14 |      |

*Note.* All test statistics are z-values. Models using gender and ECR control for each other. Categorical predictors were dummy-coded (Female, ECR, and no mention as baseline), post-level continuous predictors were standardized at the post-level (g) and blog-level (m), controlling for each other. Intercept is in the response scale, estimates are rate ratios. Intercept random effect standard deviation is provided. If model converged, random slope was added, and its standard deviation is reported. Models were analyzed using negative binomial mixed effects regressions, except for name mentions outcomes, which were analyzed using logistic mixed effects regressions. Social media impact accounted for zero-inflation for convergence. Topics were analyzed using an offset for log of post length, and 69 posts were removed due to zero preprocessed post lengths. See Table S9 for predictor intercept and SD.

Table S7. Date analyses

| Outcome           | Predictor | Intercept | Estimate | 2.50% | 97.50% | Statistic | P-value | Intercept SD | Estimate SD |
|-------------------|-----------|-----------|----------|-------|--------|-----------|---------|--------------|-------------|
| SM impact         | Date (g)  | 2.9       | 3.15     | 2.33  | 4.27   | 7.39      | <.001   | 2.17         | 0.86        |
| SM impact         | Date (m)  | 2.9       | 1.44     | 0.89  | 2.32   | 1.48      | .140    | 2.17         |             |
| Views             | Date (g)  | 2132.6    | 1.52     | 1.26  | 1.83   | 4.45      | <.001   | 1.32         | 0.39        |
| Views             | Date (m)  | 2132.6    | 0.73     | 0.54  | 0.98   | -2.11     | .035    | 1.32         | 0.39        |
| Post citations    | Date (g)  | 0.11      | 1.21     | 1     | 1.47   | 1.95      | .051    | 1.22         | 0.32        |
| Post citations    | Date (m)  | 0.11      | 0.71     | 0.52  | 0.96   | -2.25     | .024    | 1.22         |             |
| Comments          | Date (g)  | 5.53      | 1.17     | 1.02  | 1.34   | 2.31      | .021    | 1.09         | 0.34        |
| Comments          | Date (m)  | 5.53      | 0.64     | 0.49  | 0.84   | -3.25     | .001    | 1.09         |             |
| Commenter         | Date (g)  | 3.39      | 1.17     | 1.05  | 1.31   | 2.78      | .005    | 0.91         | 0.27        |
| Commenter         | Date (m)  | 3.39      | 0.69     | 0.55  | 0.85   | -3.43     | <.001   | 0.91         |             |
| Statistics        | Date (g)  | 0.13      | 1.02     | 0.98  | 1.07   | 0.97      | .330    | 0.84         | 0.08        |
| Statistics        | Date (m)  | 0.13      | 1.05     | 0.87  | 1.26   | 0.49      | .621    | 0.84         |             |
| Research findings | Date (g)  | 0.11      | 1.05     | 1.01  | 1.10   | 2.39      | .017    | 0.34         | 0.05        |
| Research findings | Date (m)  | 0.11      | 1.00     | 0.92  | 1.08   | -0.06     | .954    | 0.34         |             |
| Replication       | Date (g)  | 0.10      | 1.41     | 1.36  | 1.46   | 17.64     | <.001   | 0.74         |             |
| Replication       | Date (m)  | 0.10      | 1.24     | 1.04  | 1.47   | 2.41      | .016    | 0.74         |             |
| Fraud             | Date (g)  | 0.02      | 1.19     | 1.14  | 1.26   | 6.97      | <.001   | 0.54         |             |
| Fraud             | Date (m)  | 0.02      | 1.08     | 0.94  | 1.24   | 1.05      | .292    | 0.54         |             |
| Nominated name    | Date (g)  | 0.09      | 1.35     | 1.15  | 1.57   | 3.78      | .001    | 0.68         | 0.26        |
| Nominated name    | Date (m)  | 0.09      | 1.22     | 1.02  | 1.44   | 2.23      | .026    | 0.68         |             |
| Non-nomin. name   | Date (g)  | 6.19      | 1.27     | 1.08  | 1.51   | 2.8       | .005    | 0.9          | 0.3         |
| Non-nomin. name   | Date (m)  | 6.19      | 1.15     | 0.91  | 1.46   | 1.19      | .235    | 0.9          |             |

*Note.* All model specifications are the same as in Table S6. Interpret date analyses inferentials with additional caution, as the models do not account for potential internal structure (e.g., autocorrelation).

Table S8. Engagement and citations models controlling for post date

| Outcome        | Predictor             | Intercept | Date | Estimate | Statistic | P-value |
|----------------|-----------------------|-----------|------|----------|-----------|---------|
| SM impact      | Gender                | 0.55      | 8.69 | 1.21     | 0.52      | .600    |
| SM impact      | ECR                   | 0.55      | 8.69 | 2.58     | 1.55      | .120    |
| SM impact      | Statistics (g)        | 0.76      | 0.1  | 0.97     | -1.07     | .285    |
| SM impact      | Statistics (m)        | 0.76      | 0.1  | 0.59     | -2.35     | .019    |
| SM impact      | Research Findings (g) | 1         | 0.1  | 0.91     | -0.83     | .410    |
| SM impact      | Research Findings (m) | 1         | 0.1  | 0.79     | -0.65     | .520    |
| SM impact      | Replication (g)       | 0.88      | 0.11 | 1.29     | 11.14     | <.001   |
| SM impact      | Replication (m)       | 0.88      | 0.11 | 1.13     | 0.58      | .560    |
| SM impact      | Fraud (g)             | 2.62      | 0.11 | 0.84     | -2.46     | .014    |
| SM impact      | Fraud (m)             | 2.62      | 0.11 | 0.71     | -1.67     | .095    |
| SM impact      | Nominated name        | 0.38      | 0.11 | 1.63     | 5.87      | <.001   |
| SM impact      | Non-nominated name    | 0.38      | 0.11 | 2.57     | 3.78      | <.001   |
| Views          | Gender                | 143.8     | 0.32 | 2.83     | 1.69      | .090    |
| Views          | ECR                   | 143.8     | 0.32 | 2.62     | 1.7       | .090    |
| Views          | Statistics (g)        | 403.8     | 0.33 | 1.16     | 1.52      | .128    |
| Views          | Statistics (m)        | 403.8     | 0.33 | 0.97     | -0.13     | .900    |
| Views          | Research Findings (g) | 461.44    | 0.35 | 1.06     | 0.94      | .349    |
| Views          | Research Findings (m) | 461.44    | 0.35 | 1.12     | 0.33      | .744    |
| Views          | Replication (g)       | 291.59    | 0.3  | 1.16     | 2.03      | .043    |
| Views          | Replication (m)       | 291.59    | 0.3  | 1.26     | 0.99      | .325    |
| Views          | Fraud (g)             | 483.2     | 0.31 | 0.8      | -6.77     | <.001   |
| Views          | Fraud (m)             | 483.2     | 0.31 | 0.9      | -0.73     | .470    |
| Views          | Nominated name        | 315       | 0.33 | 1.36     | 2.88      | .004    |
| Views          | Non-nominated name    | 315       | 0.33 | 1.46     | 3.73      | <.001   |
| Post citations | Gender                | 0.02      | 0.67 | 2.19     | 2.03      | .043    |
| Post citations | ECR                   | 0.02      | 0.67 | 2.86     | 2.25      | .024    |
| Post citations | Statistics (g)        | 0.05      | 0.62 | 1.03     | 0.26      | .800    |
| Post citations | Statistics (m)        | 0.05      | 0.62 | 0.99     | -0.05     | .960    |
| Post citations | Research Findings (g) | 0.06      | 0.65 | 1.1      | 1.87      | .061    |
| Post citations | Research Findings (m) | 0.06      | 0.65 | 0.96     | -0.19     | .847    |
| Post citations | Replication (g)       | 0.05      | 0.75 | 1.48     | 9.83      | <.001   |
| Post citations | Replication (m)       | 0.05      | 0.75 | 1.22     | 1.61      | .110    |
| Post citations | Fraud (g)             | 0.06      | 0.65 | 0.98     | -0.44     | .657    |
| Post citations | Fraud (m)             | 0.06      | 0.65 | 0.84     | -1.56     | .119    |
| Post citations | Nominated name        | 0.03      | 0.7  | 2.64     | 6.68      | <.001   |
| Post citations | Non-nominated name    | 0.03      | 0.7  | 1.59     | 2.75      | .006    |
| Comments       | Gender                | 1.22      | 0.49 | 1.57     | 2.27      | .023    |
| Comments       | ECR                   | 1.22      | 0.49 | 0.84     | -0.69     | .491    |
| Comments       | Statistics (g)        | 1.45      | 0.5  | 1        | 0.06      | .949    |
| Comments       | Statistics (m)        | 1.45      | 0.5  | 1.04     | 0.24      | .812    |
| Comments       | Research Findings (g) | 1.45      | 0.5  | 0.99     | -0.18     | .857    |
| Comments       | Research Findings (m) | 1.45      | 0.5  | 1.17     | 0.63      | .530    |

|           |                       |      |      |      |       |       |
|-----------|-----------------------|------|------|------|-------|-------|
| Comments  | Replication (g)       | 1.56 | 0.52 | 1.12 | 1.93  | .054  |
| Comments  | Replication (m)       | 1.56 | 0.52 | 0.95 | -0.39 | .697  |
| Comments  | Fraud (g)             | 1.75 | 0.5  | 0.99 | -0.4  | .692  |
| Comments  | Fraud (m)             | 1.75 | 0.5  | 0.86 | -1.38 | .169  |
| Comments  | Nominated name        | 1.15 | 0.51 | 1.52 | 9.34  | <.001 |
| Comments  | Non-nominated name    | 1.15 | 0.51 | 1.29 | 7.61  | <.001 |
| Commenter | Gender                | 0.85 | 0.6  | 1.47 | 2.36  | .018  |
| Commenter | ECR                   | 0.85 | 0.6  | 1.12 | 0.53  | .595  |
| Commenter | Statistics (g)        | 1.16 | 0.61 | 0.97 | -0.48 | .629  |
| Commenter | Statistics (m)        | 1.16 | 0.61 | 0.99 | -0.06 | .955  |
| Commenter | Research Findings (g) | 1.19 | 0.61 | 1.06 | 6.13  | <.001 |
| Commenter | Research Findings (m) | 1.19 | 0.61 | 1.03 | 0.14  | .887  |
| Commenter | Replication (g)       | 1.3  | 0.62 | 1.09 | 8.63  | <.001 |
| Commenter | Replication (m)       | 1.3  | 0.62 | 0.95 | -0.47 | .638  |
| Commenter | Fraud (g)             | 1.31 | 0.6  | 0.97 | -0.86 | .390  |
| Commenter | Fraud (m)             | 1.31 | 0.6  | 0.9  | -1.21 | .225  |
| Commenter | Nominated name        | 0.99 | 0.62 | 1.36 | 7.99  | <.001 |
| Commenter | Non-nominated name    | 0.99 | 0.62 | 1.2  | 6.2   | <.001 |

Note. For social media impact, year (instead of the full date) was used as a control, due to convergence.

Table S9. Predictors' means and SDs

| Variable              | Predictor Mean | Predictor SD |
|-----------------------|----------------|--------------|
| Statistics (g)        | 20.4           | 22.5         |
| Statistics (m)        | 20.4           | 16.3         |
| Research Findings (g) | 11.8           | 10.3         |
| Research Findings (m) | 11.8           | 4.8          |
| Replication (g)       | 18.9           | 10.7         |
| Replication (m)       | 18.9           | 14.4         |
| Fraud (g)             | 3.26           | 5.3          |
| Fraud (m)             | 3.26           | 2.2          |
| Date (g)              | 12/17/2014     | 811 (days)   |
| Date (m)              | 12/17/2014     | 532 (days)   |

*Note.* Predictors' means and standard deviations are obtained from an unconditional mixed model (i.e., with the predictors as outcomes in an intercept-only model).

Table S10. Sentiment analysis

| Sentiment          | Mean | SD  | Min | Q1  | Median | Q3  | Max |
|--------------------|------|-----|-----|-----|--------|-----|-----|
| Post: Positive     | .15  | .02 | .10 | .13 | .15    | .16 | .20 |
| Post: Negative     | .07  | .02 | .03 | .06 | .07    | .08 | .11 |
| Comments: Positive | .16  | .04 | .11 | .14 | .15    | .17 | .34 |
| Comments: Negative | .07  | .02 | .04 | .06 | .07    | .08 | .11 |

*Note.* Blog-level mean, standard deviation, and 5-number summary for percentage of positive/negative words per post/comment.
